# Supplementary material for: Hierarchical porous Li2FeSiO4/C composite with 2 Li storage capacity and long cycle stability for advanced Li-ion batteries
Source: Royal Society of Chemistry journal article supplement (doi:10.1039/c3ta00611e), 2013-01-01
Supplement: c3ta00611e.pdf [file c3ta00611e.pdf]

Supplementary Material (ESI) for Journal of Materials Chemistry A

## Hierarchical Porous $\text{Li}_2\text{FeSiO}_4/\text{C}$ Composite with 2 Li Storage Capacity and Long Cycle Stability for Advanced Li-ion Batteries

Zhongxue Chen,<sup>a,c</sup> Shen Qiu,<sup>b</sup> Yuliang Cao,<sup>†a</sup> Jiangfeng Qian,<sup>b</sup> Xinping Ai,<sup>a</sup> Kai Xie,<sup>c</sup> Xiaobin Hong<sup>c</sup> and Hanxi Yang<sup>‡b</sup>

a Hubei Key Laboratory of Electrochemical Power Sources

College of Chemistry and Molecular Science, Wuhan University, Wuhan 430072, China

b College of Chemistry and Molecular Science, Wuhan University, Wuhan 430072, China

c College of Aerospace Science and Engineering, National University of Defence Technology, Changsha 410073 (China).

Fax: (+) 86-27-87884476; Tel: (+) 86-27-68754526; <sup>†</sup>E-mail: ylcao@whu.edu.cn; <sup>‡</sup>E-mail: hxyang@whu.edu.cn

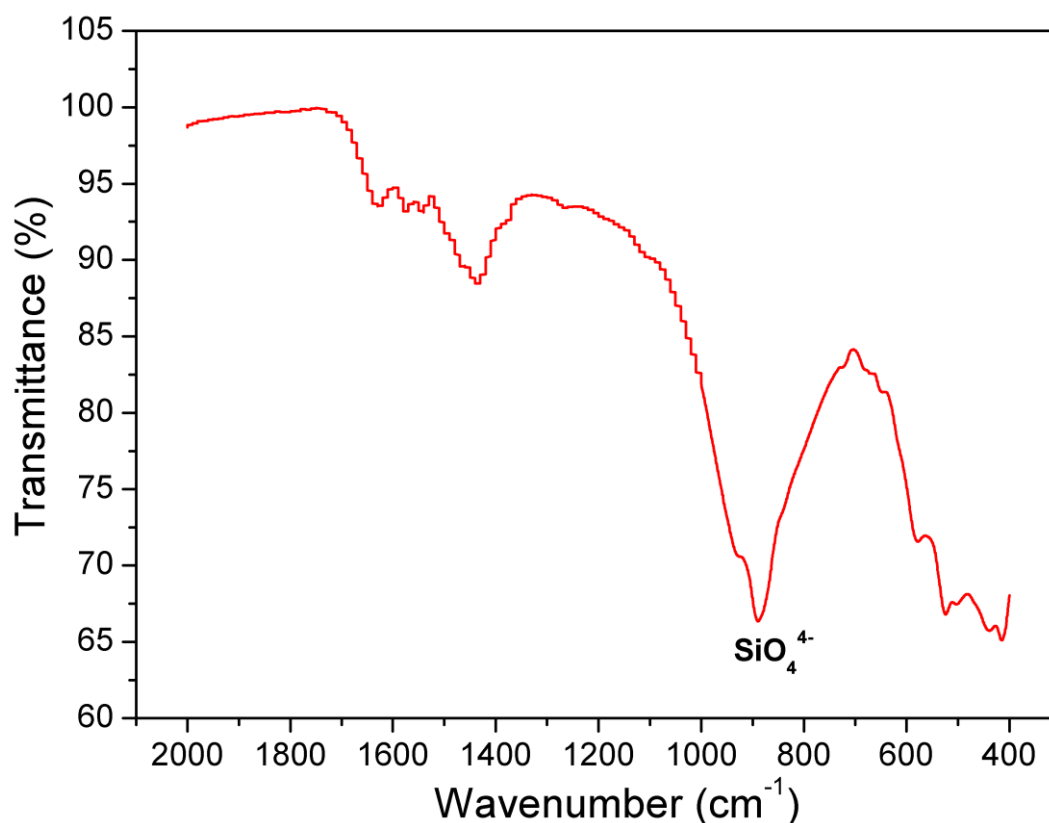

*Figure S1.* FTIR spectrum of the  $\text{Li}_2\text{FeSiO}_4/\text{C}$  composite.

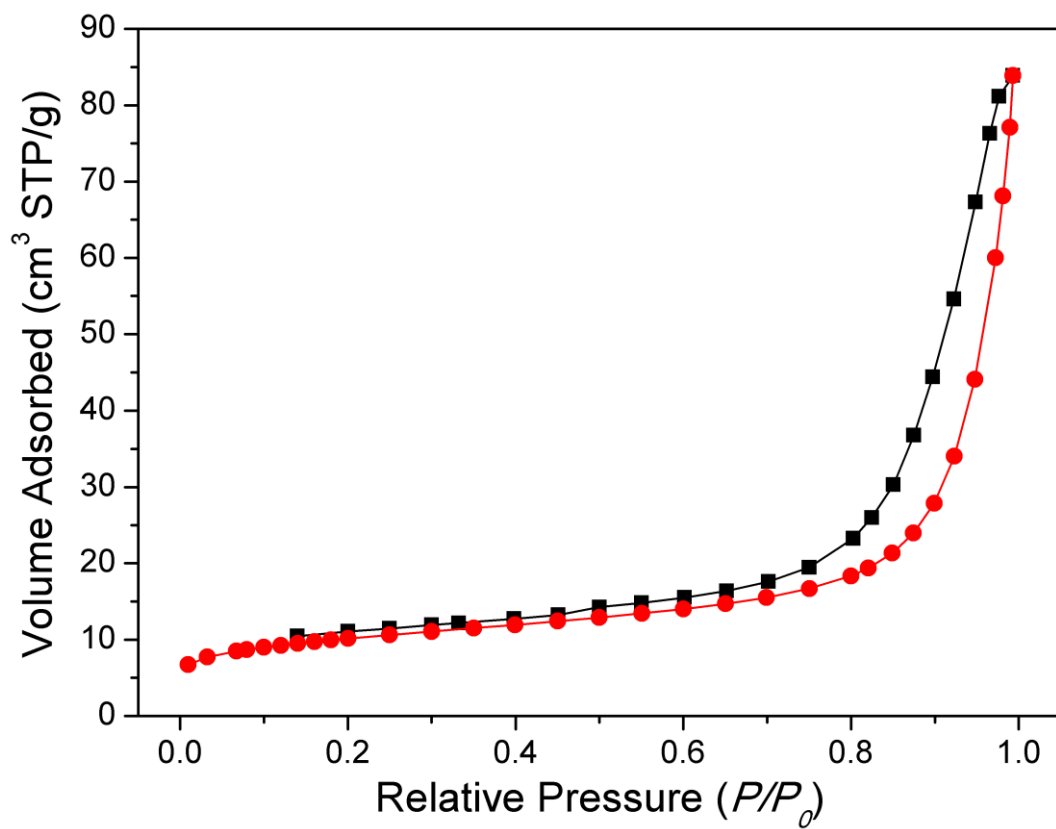

**Figure S2.** N<sub>2</sub> sorption isotherm of porous Li<sub>2</sub>FeSiO<sub>4</sub>/C composite.

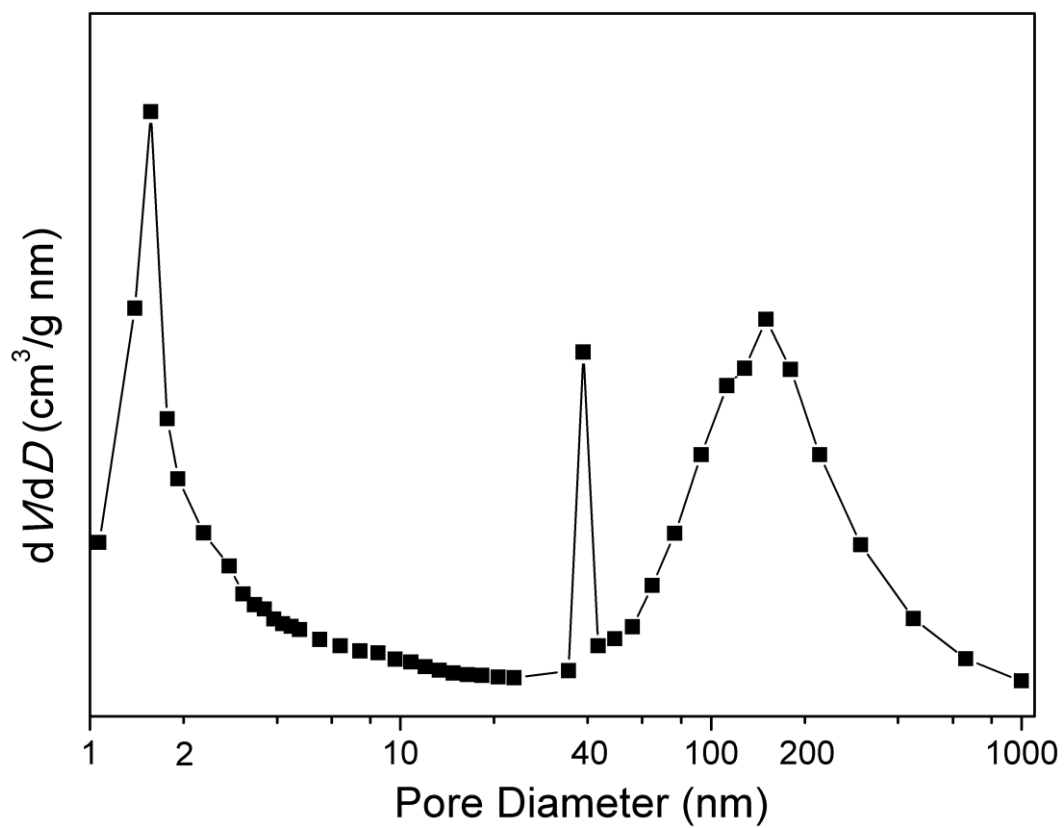

*Figure S3.* Pore size distribution of porous  $\text{Li}_2\text{FeSiO}_4/\text{C}$  composite.

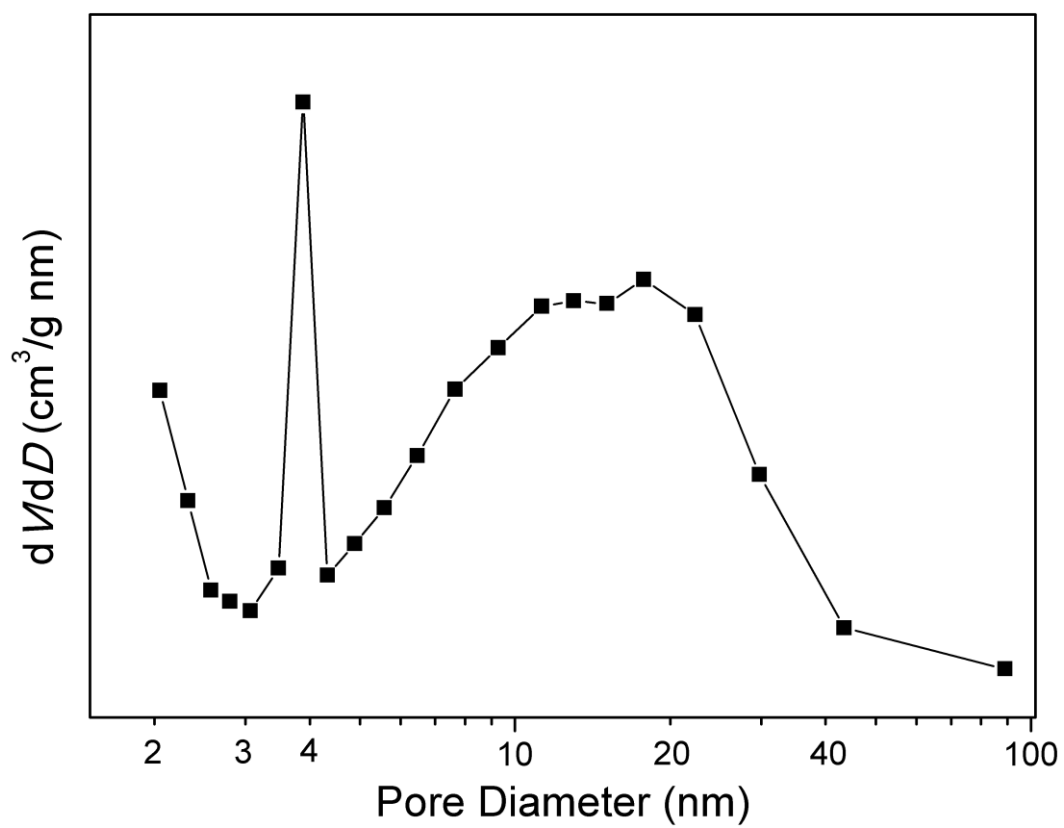

**Figure S4.** Pore size distribution of the intermediates after calcination at 450 °C.

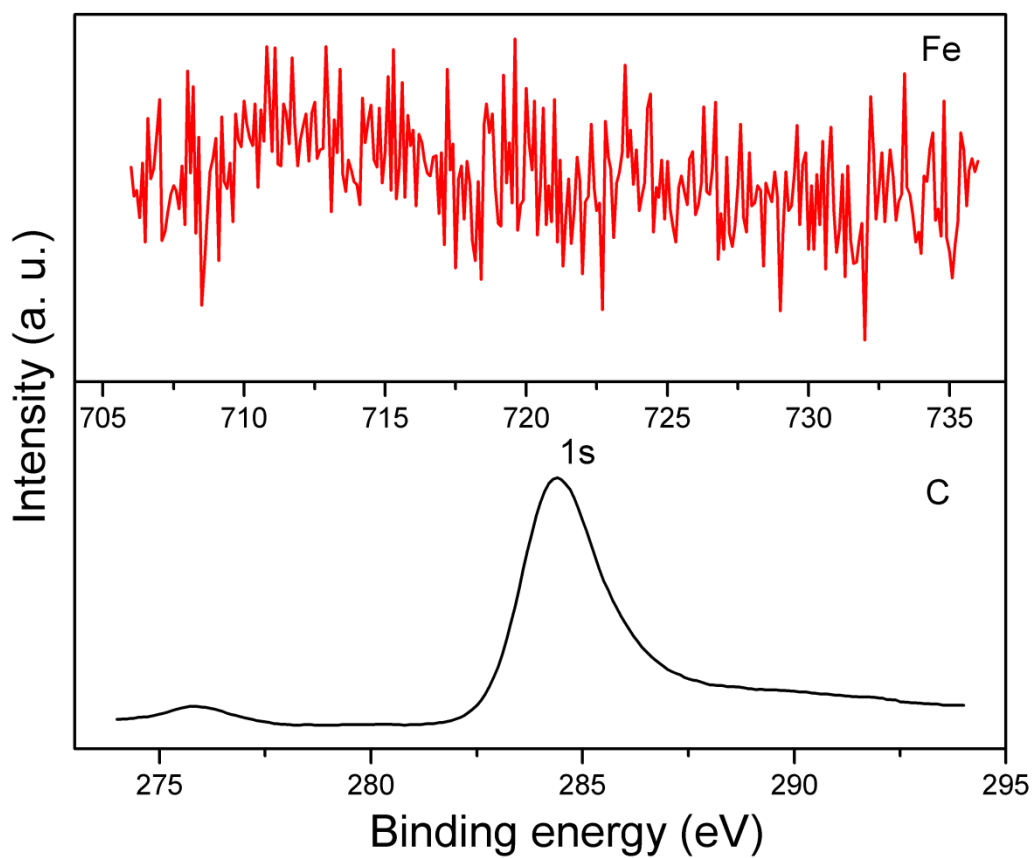

**Figure S5.** Binding energies of C and Fe in the as-prepared  $\text{Li}_2\text{FeSiO}_4/\text{C}$  composite.

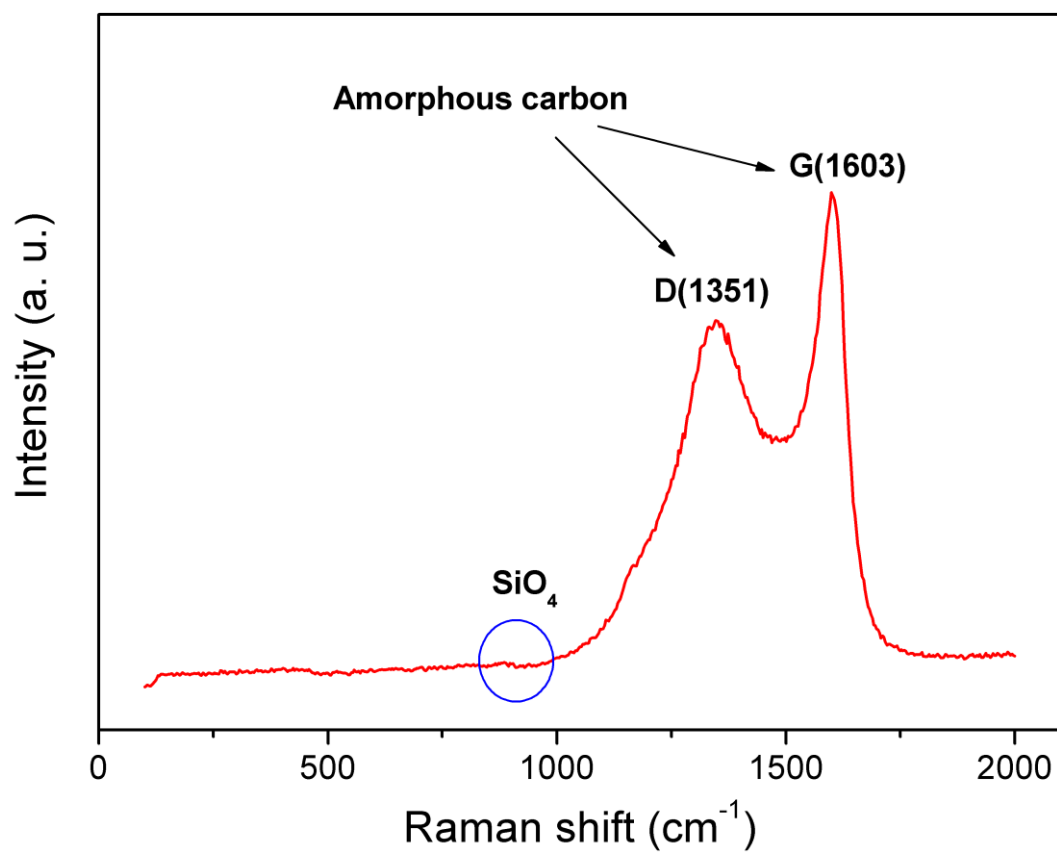

**Figure S6.** Raman spectrum of the Li<sub>2</sub>FeSiO<sub>4</sub>/C composite.

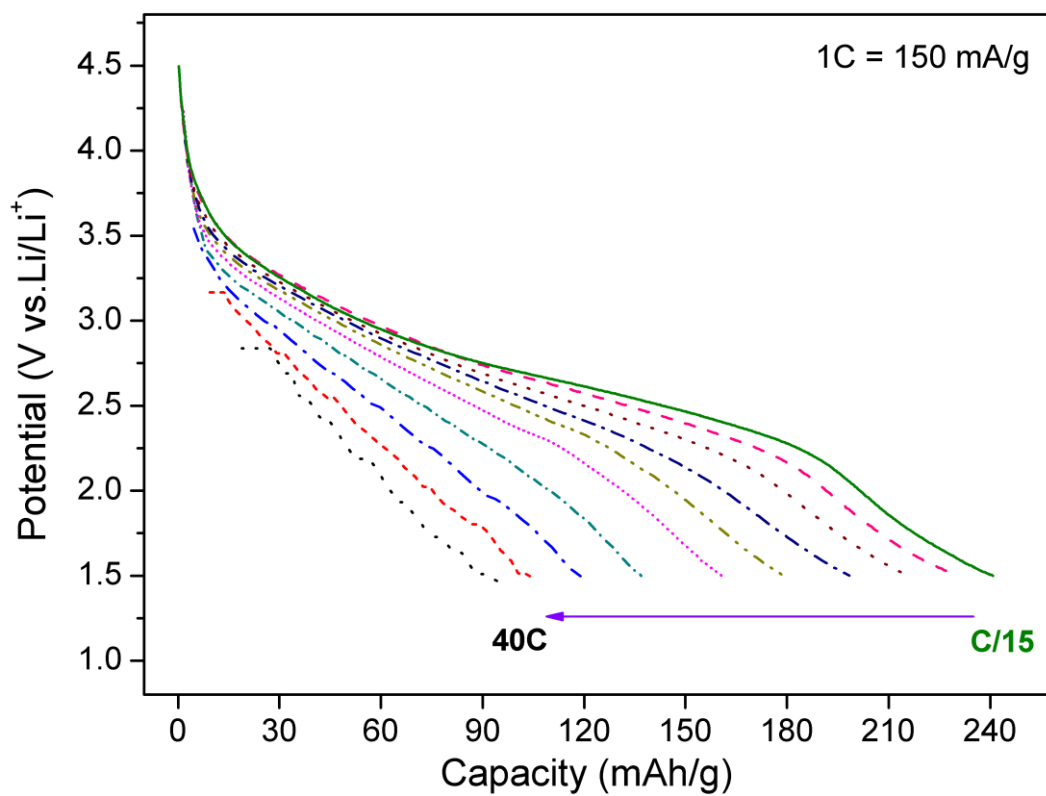

**Figure S7.** Discharge profiles of the porous  $\text{Li}_2\text{FeSiO}_4/\text{C}$  electrode at various rates between 1.5–4.7 V
